# Supplementary material
Source: publisher figshare collection journal article supplement (https://tandf.figshare.com/articles/dataset/_/8204126)
Supplement: Supplementary file 1 [file 1]

**Supplementary table 1. EDAX analysis of linalool treated and untreated struvite samples of *P. mirabilis*.**

| **Elements present in struvite** | **Control** | | **Treated** | |
| --- | --- | --- | --- | --- |
| **Weight %** | **Amount %** | **Weight %** | **Amount %** |
| Magnesium (Mg) | 01.07 | 00.66 | 00.01 | 00.00 |
| Calcium (Ca) | 05.39 | 02.02 | 01.00 | 00.40 |
| Phosphorous (P) | 07.16 | 03.48 | 02.00 | 0.40 |
